# Supplementary material for: Understanding propyl cyanide and its isomers formation: ab initio study of the spectroscopy and reaction mechanisms
Source: Royal Society of Chemistry journal article supplement (doi:10.1039/c9cp04365a), 2019-01-01
Supplement: c9cp04365a1.pdf [file c9cp04365a1.pdf]

## S2: Effective potentials

### iso-PrCN:

$$V^{\text{eff}}(\theta_1, \theta_2) = +1263.729 - 661.013 (\cos^3 \theta_1 + \cos^3 \theta_2) + 72.178 \cos^3 \theta_1 \cos^3 \theta_2 - 13.842 (\cos^6 \theta_1 + \cos^6 \theta_2) + 9.033 (\cos^6 \theta_1 \cos^3 \theta_2 + \cos^3 \theta_1 \cos^6 \theta_2) + 0.712 \cos^6 \theta_1 \cos^6 \theta_2 - 50.029 \sin^3 \theta_1 \sin^3 \theta_2 + 8.744 (\sin^3 \theta_1 - \sin^3 \theta_2) + 6.213 (\cos^3 \theta_1 \sin^3 \theta_2 - \sin^3 \theta_1 \cos^3 \theta_2) + 0.393 (\cos^6 \theta_1 \sin^3 \theta_2 - \sin^3 \theta_1 \cos^6 \theta_2).$$

### n-PrCN:

$$V^{\text{eff}}(\theta, \alpha) = +1282.431 - 70.958 \cos^1 \alpha + 79.853 \cos^2 \alpha - 690.348 \cos^3 \alpha + 11.932 \cos^4 \alpha + 4.334 \cos^5 \alpha - 6.244 \cos^6 \alpha - 605.859 \cos^3 \theta + 8.554 \cos^3 \theta \cos^1 \alpha - 0.877 \cos^3 \theta \cos^2 \alpha + 55.204 \cos^3 \theta \cos^3 \alpha + 8.261 \cos^3 \theta \cos^4 \alpha + 3.629 \cos^3 \theta \cos^5 \alpha - 1.010 \cos^3 \theta \cos^6 \alpha - 10.037 \cos^6 \theta - 2.323 \cos^6 \theta \cos^1 \alpha - 4.599 \cos^6 \theta \cos^2 \alpha + 6.345 \cos^6 \theta \cos^3 \alpha - 0.465 \cos^6 \theta \cos^4 \alpha - 0.950 \cos^6 \theta \cos^5 \alpha - 2.777 \cos^6 \theta \cos^6 \alpha - 27.215 \sin^3 \theta \sin^1 \alpha + 7.573 \sin^3 \theta \sin^2 \alpha - 44.128 \sin^3 \theta \sin^3 \alpha - 4.226 \sin^3 \theta \sin^4 \alpha + 5.714 \sin^3 \theta \sin^5 \alpha$$
