# Supplementary material for: Understanding propyl cyanide and its isomers formation: ab initio study of the spectroscopy and reaction mechanisms
Source: Royal Society of Chemistry journal article supplement (doi:10.1039/c9cp04365a), 2019-01-01
Supplement: c9cp04365a2.pdf [file c9cp04365a2.pdf]

**TABLE 1:** CCSD(T)-F12/VTZ geometries and rotational constants, CCSD(T)-F12/AVTZ relative energies, and with MP2/VTZ anharmonic frequencies of iso- and n-isopropyl.

| <b>iso-PrCN (<math>C_s X^1A'</math>)</b>                                            |                                                                                                                                                |               |               |               |
|-------------------------------------------------------------------------------------|------------------------------------------------------------------------------------------------------------------------------------------------|---------------|---------------|---------------|
| 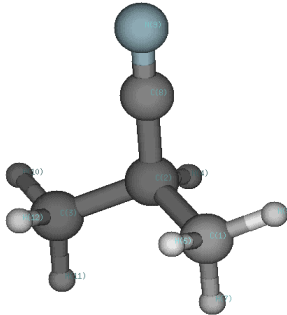   | C                                                                                                                                              | 0.000000000   | 0.0019869814  | -0.0002619615 |
|                                                                                     | C                                                                                                                                              | 1.2680185437  | 0.1785275421  | -0.8400710872 |
|                                                                                     | C                                                                                                                                              | -1.2680185437 | 0.1785275421  | -0.8400710872 |
|                                                                                     | H                                                                                                                                              | 0.000000000   | 0.7392640204  | 0.8063729169  |
|                                                                                     | C                                                                                                                                              | 0.000000000   | -1.3222354435 | 0.6418303426  |
|                                                                                     | N                                                                                                                                              | 0.000000000   | -2.3735331234 | 1.1289610857  |
|                                                                                     | H                                                                                                                                              | 2.1641563088  | 0.0569423333  | -0.2333323739 |
|                                                                                     | H                                                                                                                                              | 1.2939854804  | -0.5569886213 | -1.6444782387 |
|                                                                                     | H                                                                                                                                              | 1.2763159651  | 1.1750670285  | -1.2817769921 |
|                                                                                     | H                                                                                                                                              | -2.1641563088 | 0.0569423333  | -0.2333323739 |
|                                                                                     | H                                                                                                                                              | -1.2763159651 | 1.1750670285  | -1.2817769921 |
|                                                                                     | H                                                                                                                                              | -1.2939854804 | -0.5569886213 | -1.6444782387 |
| E(UMP2(full))/AVTZ                                                                  | -211.041323                                                                                                                                    |               |               |               |
| E(CCSD(T))/AVTZ                                                                     | -211.022850                                                                                                                                    |               |               |               |
| E(CCSD(T)-F12/AVTZ                                                                  | -211.078641                                                                                                                                    |               |               |               |
| $E_r$ ( $\text{cm}^{-1}$ )                                                          | 0.0                                                                                                                                            |               |               |               |
| ZPE ( $\text{cm}^{-1}$ )                                                            | 21957.2                                                                                                                                        |               |               |               |
| $E_r + \text{ZPE}$ ( $\text{cm}^{-1}$ )                                             | 0.0                                                                                                                                            |               |               |               |
| Anharmonic frequencies ( $\text{cm}^{-1}$ )                                         | $\nu(a')$ = 3043.7, 3037.9, 2967.6, 2987.5, 2154.1, 1498.5, 1478.0, 1393.9, 1325.8, 1176.2, 1112.6, 929.6, 776.7, 537.5, 353.6, 281.7, 214.7   |               |               |               |
|                                                                                     | $\nu(a'')$ = 3043.0, 3035.2, 2994.4, 1462.2, 1453.1, 1373.6, 1296.5, 1121.8, 968.7, 931.8, 555.4, 229.1, 180.0                                 |               |               |               |
| <b>anti-n-PrCN (<math>C_s X^1A'</math>)</b>                                         |                                                                                                                                                |               |               |               |
|  | C                                                                                                                                              | 1.4591486035  | 0.4800218209  | 0.0000000000  |
|                                                                                     | C                                                                                                                                              | 0.0015307963  | 0.6366006245  | 0.0000000000  |
|                                                                                     | C                                                                                                                                              | -0.7238258334 | -0.7132129912 | 0.0000000000  |
|                                                                                     | C                                                                                                                                              | -2.2353210659 | -0.5224698232 | 0.0000000000  |
|                                                                                     | H                                                                                                                                              | -0.2802629668 | 1.2194096078  | 0.8791696296  |
|                                                                                     | H                                                                                                                                              | -0.2802629668 | 1.2194096078  | -0.8791696296 |
|                                                                                     | H                                                                                                                                              | -0.4120731831 | -1.2838609377 | -0.8765022178 |
|                                                                                     | H                                                                                                                                              | -0.4120731831 | -1.2838609377 | 0.8765022178  |
|                                                                                     | H                                                                                                                                              | -2.7498354307 | -1.4828713429 | 0.0000000000  |
|                                                                                     | H                                                                                                                                              | -2.5590339214 | 0.0323742652  | 0.8824033386  |
|                                                                                     | H                                                                                                                                              | -2.5590339214 | 0.0323742652  | -0.8824033386 |
|                                                                                     | N                                                                                                                                              | 2.6072300730  | 0.3271858414  | 0.0000000000  |
| E(UMP2(full))                                                                       | -211.0389602                                                                                                                                   |               |               |               |
| E(CCSD(T))                                                                          | -211.0214950                                                                                                                                   |               |               |               |
| E(CCSD(T)-F12/AVTZ                                                                  | -211.077349                                                                                                                                    |               |               |               |
| $E_r$ ( $\text{cm}^{-1}$ )                                                          | 283.5                                                                                                                                          |               |               |               |
| ZPE ( $\text{cm}^{-1}$ )                                                            | 22041.0                                                                                                                                        |               |               |               |
| $E_r + \text{ZPE}$ ( $\text{cm}^{-1}$ )                                             | 367.2                                                                                                                                          |               |               |               |
| Harmonic frequencies ( $\text{cm}^{-1}$ )                                           | $\nu(a')$ =3117.1, 3098.1, 3086.4, 3074.5, 2203.2, 1522.2, 1507.5, 1483, 1420.5, 1389.4, 1304.8, 1128, 1978, 972.2, 890.4, 523.6, 343.4, 160.2 |               |               |               |

|                                                                                   |                                                                                                                                                                                                                                                                                                                                                                                                                                                                                                                                                                |                                                                                                                                                                                                                                            |
|-----------------------------------------------------------------------------------|----------------------------------------------------------------------------------------------------------------------------------------------------------------------------------------------------------------------------------------------------------------------------------------------------------------------------------------------------------------------------------------------------------------------------------------------------------------------------------------------------------------------------------------------------------------|--------------------------------------------------------------------------------------------------------------------------------------------------------------------------------------------------------------------------------------------|
|                                                                                   | $\omega(a'')$ =3165.5, 3147.7, 3130.3, 1517.2, 1338.7, 1269.5, 1135.2, 877.2, 749.6, 370.4, 247, 100                                                                                                                                                                                                                                                                                                                                                                                                                                                           |                                                                                                                                                                                                                                            |
| <b><i>gauche-n-PrCN (C<sub>1</sub> X<sup>1</sup>A)</i></b>                        |                                                                                                                                                                                                                                                                                                                                                                                                                                                                                                                                                                |                                                                                                                                                                                                                                            |
| 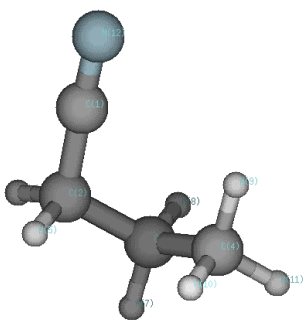 | C 1.2888695482 0.0728024513 0.0407457108<br>C 0.1587440185 0.9814298537 0.2642489571<br>C -1.1272599089 0.4643135924 -0.3925136173<br>C -1.5690489416 -0.8809152546 0.1704828198<br>H 0.0185541701 1.0863840001 1.3420446516<br>H 0.4302523270 1.9619379736 -0.1288454680<br>H -1.9048732195 1.2138942637 -0.2344969068<br>H -0.9686695016 0.3879211974 -1.4697923987<br>H -2.4911251410 -1.2160681015 -0.3035127935<br>H -0.8062106729 -1.6423709296 0.0034826368<br>H -1.7476347905 -0.8124377940 1.2453182423<br>N 2.1623391122 -0.6631642527 -0.1512958342 |                                                                                                                                                                                                                                            |
|                                                                                   | E(MP2)                                                                                                                                                                                                                                                                                                                                                                                                                                                                                                                                                         | -211.039468                                                                                                                                                                                                                                |
|                                                                                   | E(CCSD(T))                                                                                                                                                                                                                                                                                                                                                                                                                                                                                                                                                     | -211.021806                                                                                                                                                                                                                                |
|                                                                                   | E(CCSD(T)-F12/AVTZ)                                                                                                                                                                                                                                                                                                                                                                                                                                                                                                                                            | -211.077679                                                                                                                                                                                                                                |
|                                                                                   | $E_r$ (cm <sup>-1</sup> )                                                                                                                                                                                                                                                                                                                                                                                                                                                                                                                                      | 211.1                                                                                                                                                                                                                                      |
|                                                                                   | ZPE (cm <sup>-1</sup> )                                                                                                                                                                                                                                                                                                                                                                                                                                                                                                                                        | 22090.7                                                                                                                                                                                                                                    |
|                                                                                   | $E_r + ZPE$ (cm <sup>-1</sup> )                                                                                                                                                                                                                                                                                                                                                                                                                                                                                                                                | 344.6                                                                                                                                                                                                                                      |
|                                                                                   | Anharmonic frequencies (cm <sup>-1</sup> )                                                                                                                                                                                                                                                                                                                                                                                                                                                                                                                     | $\nu(a')$ = 3036.5, 3029.3, 3008.5, 3001.6, 2994.4, 3008.1, 2955.7, 2158.8, 1504, 1492.9, 1476.4, 1456.6, 1391.2, 1344.1, 1332.1, 1265.8, 1235.9, 1112, 1083.8, 1060.1, 927.2, 874.9, 848.8, 768.9, 552, 368.9, 351.1, 259.6, 172.8, 109.2 |

**TABLE II: Geometries, energies, harmonic frequencies computed with UMP2(full)/AVTZ**

| HCN                                                                               |                   |                             |
|-----------------------------------------------------------------------------------|-------------------|-----------------------------|
| 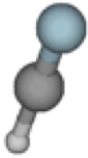 | H                 | 0.000000 0.000000 -1.564138 |
|                                                                                   | C                 | 0.000000 0.000000 -0.505556 |
|                                                                                   | N                 | 0.000000 0.000000 0.656782  |
| E(UMP2)                                                                           | -93.292044        |                             |
| E(UCCSD(T))                                                                       | -93.281103        |                             |
| Rotational constants (MHz)                                                        | Be= 44008.3219    |                             |
| Harmonic frequencies (cm <sup>-1</sup> )                                          | $\omega(\pi)=703$ | $\omega(\sigma)=2048, 3493$ |
| ZPE (cm <sup>-1</sup> )                                                           | 3474.94           |                             |

| CH <sub>3</sub> CHCH <sub>2</sub>                                                  |                                                                            |                                                    |
|------------------------------------------------------------------------------------|----------------------------------------------------------------------------|----------------------------------------------------|
| 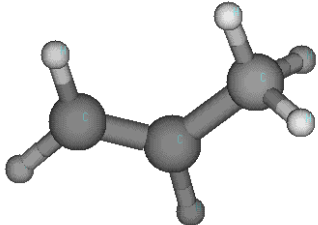 | C                                                                          | -1.223715 -0.162121 0.000000                       |
|                                                                                    | C                                                                          | 0.129623 0.457776 0.000000                         |
|                                                                                    | C                                                                          | 1.272075 -0.222427 0.000000                        |
|                                                                                    | H                                                                          | 0.172667 1.538408 0.000000                         |
|                                                                                    | H                                                                          | -1.793300 0.144853 -0.875611                       |
|                                                                                    | H                                                                          | -1.153817 -1.247138 0.000000                       |
|                                                                                    | H                                                                          | -1.793300 0.144853 0.875611                        |
|                                                                                    | H                                                                          | 2.224600 0.281685 0.000000                         |
|                                                                                    | H                                                                          | 1.275250 -1.302026 0.000000                        |
| E(UMP2)                                                                            | -117.688965                                                                |                                                    |
| E(UCCSD(T))                                                                        | -117.689998                                                                |                                                    |
| Rotational constants (MHz)                                                         | Ae=47022.6123                                                              | Be=9430.6045 Ce=8251.6137                          |
| Harmonic frequencies (cm <sup>-1</sup> )                                           | $\omega(a')=3192,3173,3137,3070,1716,1522,1466,1420,1326,1202,952,945,595$ | $\omega(a'')=3262,3154,1509,1087,1039,946,424,215$ |
| ZPE (cm <sup>-1</sup> )                                                            | 17681.75                                                                   |                                                    |

| vdw vdw1(R1) Reactant_mep2                                                          |                                                                                                                      |                                           |
|-------------------------------------------------------------------------------------|----------------------------------------------------------------------------------------------------------------------|-------------------------------------------|
| 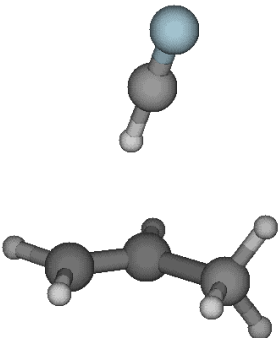 | C                                                                                                                    | -1.4291019443 -1.1080097576 -0.0051514954 |
|                                                                                     | C                                                                                                                    | -0.9239945715 0.285921886 -0.1366120076   |
|                                                                                     | C                                                                                                                    | -0.1428514220 0.8929512883 0.7546130116   |
|                                                                                     | C                                                                                                                    | 1.9991009535 -1.2724980305 -1.0346377967  |
|                                                                                     | N                                                                                                                    | 2.7740793166 -1.9794607247 -1.5365611999  |
|                                                                                     | H                                                                                                                    | 0.1653092551 0.3871323282 1.6587907385    |
|                                                                                     | H                                                                                                                    | 0.1950453263 1.9061382643 0.6067844127    |
|                                                                                     | H                                                                                                                    | -1.2160780359 0.8317070606 -1.0246353141  |
|                                                                                     | H                                                                                                                    | 1.2907082796 -0.6247294357 -0.5785412593  |
|                                                                                     | H                                                                                                                    | -1.1003850234 -1.7245339955 -0.8415400046 |
|                                                                                     | H                                                                                                                    | -1.0804911642 -1.5653556848 0.9176780650  |
|                                                                                     | H                                                                                                                    | -2.5173829697 -1.1262651985 -0.0079901502 |
| E(UMP2)                                                                             | -210.98949916447                                                                                                     |                                           |
| E(UCCSD(T))                                                                         | -210.97653577                                                                                                        |                                           |
| Rotational constants (MHz)                                                          | Ae=8171.4105                                                                                                         | Be=1867.0950 Ce=1608.0291                 |
| Anharmonic frequencies (cm <sup>-1</sup> )                                          | $\nu(a')=3453, 3264, 3185, 3170, 3155, 3135, 3069, 2045, 1710, 1521, 1504, 1466, 1424, 1327, 1203, 1088, 1041, 956,$ |                                           |

|                         |                                                          |
|-------------------------|----------------------------------------------------------|
|                         | 950, 944, 836, 791, 605, 424, 221, 149, 133, 117, 73, 49 |
| ZPE (cm <sup>-1</sup> ) | 21512.46                                                 |

| <b>vdw2(R2) TRIANGLE</b>                                                          |                                                                                                                                                                                  |              |               |               |
|-----------------------------------------------------------------------------------|----------------------------------------------------------------------------------------------------------------------------------------------------------------------------------|--------------|---------------|---------------|
| 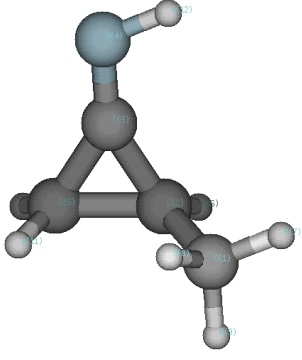 | C                                                                                                                                                                                | 1.1599143339 | -0.9211959848 | 0.0961131985  |
|                                                                                   | C                                                                                                                                                                                | 2.4052068596 | -0.126190072  | -0.1677073080 |
|                                                                                   | C                                                                                                                                                                                | 2.2979374014 | 1.2485023681  | -0.6444506123 |
|                                                                                   | N                                                                                                                                                                                | 1.9999114464 | 2.4629504337  | -0.4712997906 |
|                                                                                   | C                                                                                                                                                                                | 2.7366014847 | 0.2741410214  | -1.6306443193 |
|                                                                                   | H                                                                                                                                                                                | 3.2678498507 | -0.3660943555 | 0.4388600020  |
|                                                                                   | H                                                                                                                                                                                | 0.8145949373 | -0.7840283857 | 1.1185530553  |
|                                                                                   | H                                                                                                                                                                                | 0.3633033403 | -0.5972259373 | -0.5708614887 |
|                                                                                   | H                                                                                                                                                                                | 1.3321905708 | -1.9826792679 | -0.0686417795 |
|                                                                                   | H                                                                                                                                                                                | 3.7745794397 | 0.2647097673  | -1.9252628660 |
|                                                                                   | H                                                                                                                                                                                | 2.0337883726 | -0.0423598208 | -2.3870915548 |
|                                                                                   | H                                                                                                                                                                                | 1.7089609625 | 2.6097482333  | 0.4954994635  |
| E(UMP2)                                                                           | -210.97418637765                                                                                                                                                                 |              |               |               |
| E(UCCSD(T))                                                                       | -210.95780708                                                                                                                                                                    |              |               |               |
| Rotational constants (MHz)                                                        | Ae=9482.9666                                                                                                                                                                     | Be=4213.6512 | Ce=3314.9341  |               |
| Anharmonic frequencies (cm <sup>-1</sup> )                                        | ν(a')=3459, 3248, 3177, 3160, 3152, 3148, 3072, 1853, 1530, 1512<br>1455, 1426, 1363, 1273, 1187, 1151, 1133, 1087, 1032, 1023, 987, 898, 833, 757, 726, 493, 395, 323, 215, 171 |              |               |               |
| ZPE (cm <sup>-1</sup> )                                                           | 22626.74                                                                                                                                                                         |              |               |               |

| <b>iso-PrCN (iso-propyl) iso-C<sub>3</sub>H<sub>7</sub>CN Product_mep1= iso-C<sub>3</sub>H<sub>7</sub>CN</b> |                                                                                                                                                                               |              |               |               |
|--------------------------------------------------------------------------------------------------------------|-------------------------------------------------------------------------------------------------------------------------------------------------------------------------------|--------------|---------------|---------------|
| 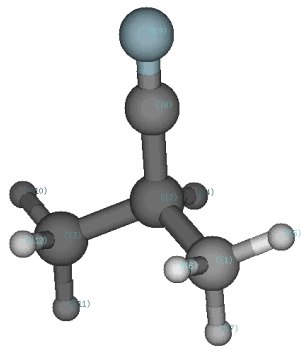                          | C                                                                                                                                                                             | 1.1101925805 | -0.8413177279 | -0.0240084307 |
|                                                                                                              | C                                                                                                                                                                             | 2.2718836034 | 0.0528841166  | -0.4341479007 |
|                                                                                                              | C                                                                                                                                                                             | 1.9773481302 | 1.5190155388  | -0.1495574353 |
|                                                                                                              | H                                                                                                                                                                             | 2.4506796995 | -0.0696252684 | -1.5023771344 |
|                                                                                                              | H                                                                                                                                                                             | 1.3226970709 | -1.8851406816 | -0.2362103904 |
|                                                                                                              | H                                                                                                                                                                             | 0.916178969  | -0.7388014105 | 1.0408923605  |
|                                                                                                              | H                                                                                                                                                                             | 0.2166377867 | -0.5469609999 | -0.5688201595 |
|                                                                                                              | C                                                                                                                                                                             | 3.4860773155 | -0.3567348195 | 0.2508392782  |
|                                                                                                              | N                                                                                                                                                                             | 4.4500300869 | -0.6807486398 | 0.8223536079  |
|                                                                                                              | H                                                                                                                                                                             | 2.8062152529 | 2.1529389517  | -0.4510132715 |
|                                                                                                              | H                                                                                                                                                                             | 1.0869780506 | 1.8220199163  | -0.6948403140 |
|                                                                                                              | H                                                                                                                                                                             | 1.7997384539 | 1.6661980243  | 0.9129667900  |
| E(UMP2)                                                                                                      | -211.04132280246                                                                                                                                                              |              |               |               |
| E(UCCSD(T))                                                                                                  | -211.02285003                                                                                                                                                                 |              |               |               |
| Rotational constants (MHz)                                                                                   | Ae=8106.4049                                                                                                                                                                  | Be=4004.3570 | Ce=2943.4345  |               |
| Harmonic frequencies (cm <sup>-1</sup> )                                                                     | ν(a')=3172, 3172, 3166, 3163, 3091, 3084, 3083, 2215, 1534, 1528, 1512, 1510, 1433, 1410, 1364, 1331, 1211, 1156, 1137, 994, 963, 942, 792, 559, 541, 357, 283, 217, 210, 183 |              |               |               |
| ZPE (cm <sup>-1</sup> )                                                                                      | 22663.83                                                                                                                                                                      |              |               |               |

| <b>(ts-mep1)ts-iso-propyl(mep1)</b>                                               |                                                                                                                                                                               |               |               |               |
|-----------------------------------------------------------------------------------|-------------------------------------------------------------------------------------------------------------------------------------------------------------------------------|---------------|---------------|---------------|
| 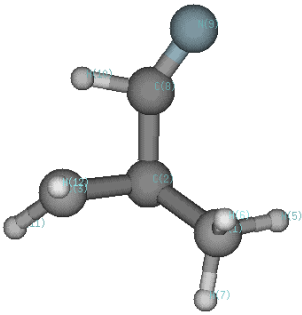 | C                                                                                                                                                                             | 1.0717580333  | -0.7996756625 | -0.1592190675 |
|                                                                                   | C                                                                                                                                                                             | 2.3062607374  | 0.0750730598  | -0.0723502289 |
|                                                                                   | C                                                                                                                                                                             | 2.9890230179  | 0.2225636788  | -1.4201534410 |
|                                                                                   | H                                                                                                                                                                             | 2.9570069343  | -0.2469740322 | 0.7386615221  |
|                                                                                   | H                                                                                                                                                                             | 0.5305133075  | -0.7985069731 | 0.7817542761  |
|                                                                                   | H                                                                                                                                                                             | 0.4088549364  | -0.4339687848 | -0.9409419836 |
|                                                                                   | H                                                                                                                                                                             | 1.3638796535  | -1.8186993716 | -0.4026440196 |
|                                                                                   | C                                                                                                                                                                             | 1.9015017161  | 1.4924376733  | 0.0186247718  |
|                                                                                   | N                                                                                                                                                                             | 1.6307088846  | 2.4559671832  | 0.6452149568  |
|                                                                                   | H                                                                                                                                                                             | 2.0283680242  | 1.6420337747  | -1.2407677720 |
|                                                                                   | H                                                                                                                                                                             | 3.9473802131  | 0.7148134984  | -1.4457193321 |
| H                                                                                 | 2.7595835415                                                                                                                                                                  | -0.4647860439 | -2.2193936822 |               |
| E(UMP2)                                                                           | -210.84724864158                                                                                                                                                              |               |               |               |
| E(UCCSD(T))                                                                       | -210.86042357                                                                                                                                                                 |               |               |               |
| Rotational constants (MHz)                                                        | Ae=18810.5446                                                                                                                                                                 | Be=2521.7722  | Ce=2393.4955  |               |
| Anharmonic frequencies (cm <sup>-1</sup> )                                        | v(a')=-2010, 3292, 3186, 3180, 3159, 3110, 3080, 2313, 1677, 1522, 1522, 1476, 1422, 1342, 1299, 1188, 1134, 1064, 977, 942, 919, 863, 811, 609, 500, 445, 348, 276, 255, 163 |               |               |               |
| ZPE (cm <sup>-1</sup> )                                                           | 21044.32                                                                                                                                                                      |               |               |               |

| <b>a-C<sub>3</sub>H<sub>7</sub>CN (a-propyl) Product mep1 =a-propyl</b>             |                                                                                                                                                                               |                  |               |               |
|-------------------------------------------------------------------------------------|-------------------------------------------------------------------------------------------------------------------------------------------------------------------------------|------------------|---------------|---------------|
| 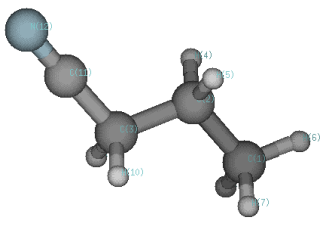 | C                                                                                                                                                                             | 2.3297991089     | -0.2710784448 | 0.0159859615  |
|                                                                                     | C                                                                                                                                                                             | 0.8455885073     | -0.5723991144 | -0.0346888252 |
|                                                                                     | C                                                                                                                                                                             | 0.0287963336     | 0.7131312427  | -0.0514667394 |
|                                                                                     | H                                                                                                                                                                             | 0.549427409      | -1.1685361273 | 0.8262527302  |
|                                                                                     | H                                                                                                                                                                             | 0.6063994187     | -1.1551485156 | -0.9221015593 |
|                                                                                     | H                                                                                                                                                                             | 2.9139569605     | -1.1871002919 | 0.0280348663  |
|                                                                                     | H                                                                                                                                                                             | 2.6370309868     | 0.3119303551  | -0.8499776882 |
|                                                                                     | H                                                                                                                                                                             | 2.5797046569     | 0.2985078737  | 0.9089038881  |
|                                                                                     | H                                                                                                                                                                             | 0.2468492122     | 1.3035823885  | 0.8371222571  |
|                                                                                     | H                                                                                                                                                                             | 0.3040156998     | 1.3170624311  | -0.9147664653 |
|                                                                                     | C                                                                                                                                                                             | -1.3966070787    | 0.4584474903  | -0.1000407316 |
|                                                                                     | N                                                                                                                                                                             | -2.5378382148    | 0.2233427125  | -0.1387936940 |
|                                                                                     | E(UMP2)                                                                                                                                                                       | -211.03896021651 |               |               |
|                                                                                     | E(UCCSD(T))                                                                                                                                                                   | -211.02149496    |               |               |
| Rotational constants (MHz)                                                          | Ae=24072.3384                                                                                                                                                                 | Be=2297.4797     | Ce=2181.5253  |               |
| Harmonic frequencies (cm <sup>-1</sup> )                                            | v(a')=3163, 3155, 3139, 3122, 3097, 3086, 3077, 2225, 1528, 1528, 1515, 1485, 1428, 1398, 1346, 1309, 1280, 1141, 1133, 1085, 986, 896, 879, 736, 526, 377, 349, 242, 162, 93 |                  |               |               |
| ZPE (cm <sup>-1</sup> )                                                             | 22752.05                                                                                                                                                                      |                  |               |               |

| <b>(ts-a-propyl(MEP1)) ts-mep1</b>                                                |                                                                                                                                                                               |                  |               |               |
|-----------------------------------------------------------------------------------|-------------------------------------------------------------------------------------------------------------------------------------------------------------------------------|------------------|---------------|---------------|
| 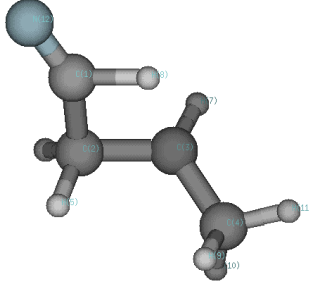 | C                                                                                                                                                                             | 1.9119700543     | -0.2680571495 | 0.1230199209  |
|                                                                                   | C                                                                                                                                                                             | 0.5254022961     | -0.3347439089 | -0.3968497235 |
|                                                                                   | C                                                                                                                                                                             | -0.3418328220    | 0.9094211208  | -0.4669369419 |
|                                                                                   | H                                                                                                                                                                             | -0.8598495983    | -0.6838245373 | 0.5694507181  |
|                                                                                   | H                                                                                                                                                                             | 0.2994698240     | -1.0770330978 | -1.1477416221 |
|                                                                                   | H                                                                                                                                                                             | 2.3364585396     | -1.2574532592 | 0.2625428815  |
|                                                                                   | H                                                                                                                                                                             | 2.5546174255     | 0.2746555732  | -0.5776644977 |
|                                                                                   | H                                                                                                                                                                             | 1.9493450425     | 0.2640595081  | 1.0711811582  |
|                                                                                   | H                                                                                                                                                                             | 0.0118899506     | 1.6577811517  | 0.2392614790  |
|                                                                                   | H                                                                                                                                                                             | -0.4639486280    | 1.3696994572  | -1.4448485502 |
|                                                                                   | C                                                                                                                                                                             | -1.5503399750    | 0.2831269881  | 0.1015689632  |
|                                                                                   | N                                                                                                                                                                             | -2.7218961092    | 0.2269231534  | 0.2280982147  |
|                                                                                   | E(UMP2)                                                                                                                                                                       | -210.84808359124 |               |               |
| E(UCCSD(T))                                                                       | -210.86282892                                                                                                                                                                 |                  |               |               |
| Rotational constants (MHz)                                                        | Ae=18810.5446                                                                                                                                                                 | Be=2521.7722     | Ce=2393.4955  |               |
| Anharmonic frequencies (cm <sup>-1</sup> )                                        | ν(a')=-2028, 3215, 3171, 3160, 3119, 3100, 3033, 2324, 1672, 1511, 1506, 1482, 1430, 1396, 1276, 1232, 1164, 1138, 1047, 968, 956, 885, 859, 653, 548, 476, 347, 224, 177, 94 |                  |               |               |
| ZPE (cm <sup>-1</sup> )                                                           | 21087.78                                                                                                                                                                      |                  |               |               |

| <b>(g-propyl) g-C<sub>3</sub>H<sub>7</sub>CN</b>                                    |                                                                                                                                                                                |                  |               |               |
|-------------------------------------------------------------------------------------|--------------------------------------------------------------------------------------------------------------------------------------------------------------------------------|------------------|---------------|---------------|
| 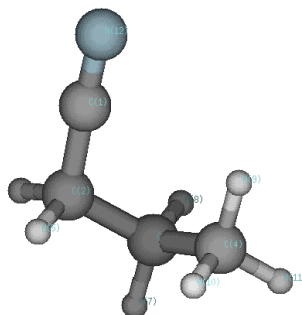 | C                                                                                                                                                                              | 1.2453158476     | 0.0298336670  | 0.0635063051  |
|                                                                                     | C                                                                                                                                                                              | 0.1567311228     | 0.9657065395  | 0.2677932569  |
|                                                                                     | C                                                                                                                                                                              | -1.1316199969    | 0.4859031106  | -0.3918180098 |
|                                                                                     | C                                                                                                                                                                              | -1.5963938194    | -0.8476459507 | 0.1576364745  |
|                                                                                     | H                                                                                                                                                                              | 0.0037794813     | 1.0840132956  | 1.3395419399  |
|                                                                                     | H                                                                                                                                                                              | 0.4532366437     | 1.9346723126  | -0.1283302582 |
|                                                                                     | H                                                                                                                                                                              | -1.8913224146    | 1.2485980327  | -0.2309974119 |
|                                                                                     | H                                                                                                                                                                              | -0.9710137554    | 0.4125696760  | 1.4658584038  |
|                                                                                     | H                                                                                                                                                                              | -0.8460074577    | -1.6169636960 | -0.0104934647 |
|                                                                                     | H                                                                                                                                                                              | -1.7774030852    | -0.7820629535 | 1.2289673441  |
|                                                                                     | H                                                                                                                                                                              | -2.5186267273    | -1.1657441734 | -0.3207149345 |
|                                                                                     | N                                                                                                                                                                              | 2.0986171611     | -0.7436718605 | -0.1185288375 |
|                                                                                     | E(UMP2)                                                                                                                                                                        | -211.03946801837 |               |               |
| E(UCCSD(T))                                                                         | -211.02180638                                                                                                                                                                  |                  |               |               |
| Rotational constants (MHz)                                                          | Ae=10092.6647                                                                                                                                                                  | Be=3365.0542     | Ce=2763.5906  |               |
| Anharmonic frequencies (cm <sup>-1</sup> )                                          | ν(a')=3163, 3155, 3141, 3129, 3093, 3089, 3078, 2223, 1530, 1525, 1511, 1484, 1432, 1383, 1369, 1301, 1274, 1139, 1114, 1086, 949, 890, 867, 770, 557, 372, 355, 258, 173, 105 |                  |               |               |
| ZPE (cm <sup>-1</sup> )                                                             | 22764.34                                                                                                                                                                       |                  |               |               |

| <b>(Reactant mep1 ) Product mep2=reactant-mep1</b>                                |                                                                                                                                                                              |               |               |               |
|-----------------------------------------------------------------------------------|------------------------------------------------------------------------------------------------------------------------------------------------------------------------------|---------------|---------------|---------------|
| 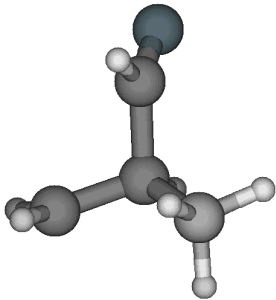 | C                                                                                                                                                                            | -0.8700865842 | -1.4747950221 | 0.0518583304  |
|                                                                                   | C                                                                                                                                                                            | 0.2648767145  | -0.4658096727 | 0.0776314024  |
|                                                                                   | C                                                                                                                                                                            | 1.1429175113  | -0.5414758276 | -1.1018793513 |
|                                                                                   | H                                                                                                                                                                            | 0.8422611382  | -0.5634816801 | 0.9923516702  |
|                                                                                   | H                                                                                                                                                                            | -1.5248231958 | -1.3419632827 | 0.9092351091  |
|                                                                                   | H                                                                                                                                                                            | -1.4612594331 | -1.3588527601 | -0.8552195733 |
|                                                                                   | H                                                                                                                                                                            | -0.4703030413 | -2.4848536679 | 0.0683710889  |
|                                                                                   | C                                                                                                                                                                            | -0.3352889637 | 0.9447118747  | 0.0901867067  |
|                                                                                   | N                                                                                                                                                                            | -0.0581211845 | 1.7898936517  | 0.9148005647  |
|                                                                                   | H                                                                                                                                                                            | -1.0439129056 | 1.1547254118  | -0.7128663688 |
|                                                                                   | H                                                                                                                                                                            | 2.1596132894  | -0.1977294809 | -1.0467935629 |
| H                                                                                 | 0.7153066548                                                                                                                                                                 | -0.7144535442 | -2.0752310162 |               |
| E(UMP2)                                                                           | -210.88905056837                                                                                                                                                             |               |               |               |
| E(UCCSD(T))                                                                       | -210.89363658                                                                                                                                                                |               |               |               |
| Rotational constants (MHz)                                                        | Ae=8158.1220                                                                                                                                                                 | Be=4133.8646  | Ce=3098.9744  |               |
| Anharmonic frequencies (cm <sup>-1</sup> )                                        | v(a')=3306, 3208, 3171, 3157, 3129, 3078, 3069, 2165, 1526, 1522, 1496, 1419, 1371, 1301, 1237, 1192, 1143, 1073, 957, 941, 925, 823, 602, 489, 360, 336, 306, 235, 222, 110 |               |               |               |
| ZPE (cm <sup>-1</sup> )                                                           | 21942.85                                                                                                                                                                     |               |               |               |

| <b>Reactant mep2</b>                                                                |                                                                                                                                                                           |               |               |               |
|-------------------------------------------------------------------------------------|---------------------------------------------------------------------------------------------------------------------------------------------------------------------------|---------------|---------------|---------------|
| 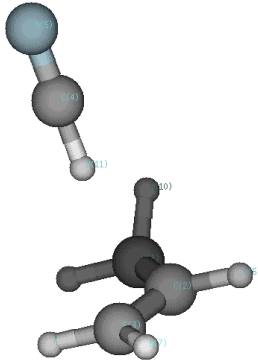 | C                                                                                                                                                                         | -0.8584422146 | -1.3089403880 | 0.1433777874  |
|                                                                                     | C                                                                                                                                                                         | 0.5221338386  | -0.7823039851 | -0.0357092928 |
|                                                                                     | C                                                                                                                                                                         | -1.0341326454 | 2.2724079442  | 0.1340039259  |
|                                                                                     | N                                                                                                                                                                         | -1.7101561114 | 3.1597141472  | 0.4626284416  |
|                                                                                     | C                                                                                                                                                                         | 1.0027278585  | -0.2976535735 | -1.1790194482 |
|                                                                                     | H                                                                                                                                                                         | 1.1688857643  | -0.7962834108 | 0.8322191936  |
|                                                                                     | H                                                                                                                                                                         | -1.3948103046 | -0.7499641714 | 0.9098847953  |
|                                                                                     | H                                                                                                                                                                         | -1.4230860145 | -1.2504841705 | -0.7840225898 |
|                                                                                     | H                                                                                                                                                                         | -0.8364385329 | -2.3478046301 | 0.4673931235  |
|                                                                                     | H                                                                                                                                                                         | -0.4154008463 | 1.4613614248  | -0.1640092115 |
|                                                                                     | H                                                                                                                                                                         | 2.0127873331  | 0.0727264893  | -1.2509403399 |
| H                                                                                   | 0.3934168752                                                                                                                                                              | -0.2728476761 | -2.0714723850 |               |
| E(UMP2)                                                                             | -210.98949916447                                                                                                                                                          |               |               |               |
| E(UCCSD(T))                                                                         | -210.97653577                                                                                                                                                             |               |               |               |
| Rotational constants (MHz)                                                          | Ae=8170.8441                                                                                                                                                              | Be=1866.1846  | Ce=1607.3617  |               |
| Anharmonic frequencies (cm <sup>-1</sup> )                                          | v(a')=3453, 3264, 3185, 3170, 3155, 3135, 3069, 2045, 1710, 1521, 1504, 1466, 1424, 1327, 1203, 1088, 1041, 956, 950, 944, 836, 790, 605, 425, 221, 149, 133, 117, 73, 49 |               |               |               |
| ZPE (cm <sup>-1</sup> )                                                             | 21512.46                                                                                                                                                                  |               |               |               |

| <b>ts_mep2</b>                                                                    |                                                                                                                                                                               |               |               |               |
|-----------------------------------------------------------------------------------|-------------------------------------------------------------------------------------------------------------------------------------------------------------------------------|---------------|---------------|---------------|
| 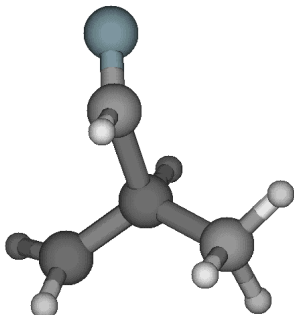 | C                                                                                                                                                                             | -0.8863636228 | -1.4297772176 | 0.0490186485  |
|                                                                                   | C                                                                                                                                                                             | 0.3221676206  | -0.5281088481 | 0.0570240674  |
|                                                                                   | C                                                                                                                                                                             | -0.4095407446 | 1.0842378521  | 0.0815918322  |
|                                                                                   | N                                                                                                                                                                             | -0.0441463034 | 1.8310549543  | 0.9137088301  |
|                                                                                   | C                                                                                                                                                                             | 1.1309509979  | -0.4691677485 | -1.0905784377 |
|                                                                                   | H                                                                                                                                                                             | 0.8556432325  | -0.5205537051 | 0.9958380504  |
|                                                                                   | H                                                                                                                                                                             | -1.5605719262 | -1.1889419848 | 0.8663657101  |
|                                                                                   | H                                                                                                                                                                             | -1.4286127172 | -1.3378736778 | -0.8902823240 |
|                                                                                   | H                                                                                                                                                                             | -0.5706674894 | -2.4649469866 | 0.1543183283  |
|                                                                                   | H                                                                                                                                                                             | -1.1390246793 | 1.0855910958  | -0.7120998402 |
|                                                                                   | H                                                                                                                                                                             | 2.1319050058  | -0.0800508365 | -1.0406395430 |
|                                                                                   | H                                                                                                                                                                             | 0.7045066260  | -0.6363938972 | -2.0664893220 |
| E(UMP2)                                                                           | -210.88144453047                                                                                                                                                              |               |               |               |
| E(UCCSD(T))                                                                       | -210.89660685                                                                                                                                                                 |               |               |               |
| Rotational constants (MHz)                                                        | Ae=7955.8619                                                                                                                                                                  | Be=4028.8099  | Ce=3056.9173  |               |
| Anharmonic frequencies (cm <sup>-1</sup> )                                        | ν(a')=-999, 3300, 3222, 3204, 3203, 3168, 3155, 3078, 2172, 1534, 1521, 1512, 1432, 1410, 1259, 1203, 1147, 1082, 1018, 947, 918, 874, 771, 480, 438, 372, 317, 254, 224, 114 |               |               |               |
| ZPE (cm <sup>-1</sup> )                                                           | 21672.24                                                                                                                                                                      |               |               |               |

| <b>Reactant_mep1 (Product_mep2 =reactant_mep1)</b>                                  |                                                                                                                                                                              |               |               |               |
|-------------------------------------------------------------------------------------|------------------------------------------------------------------------------------------------------------------------------------------------------------------------------|---------------|---------------|---------------|
| 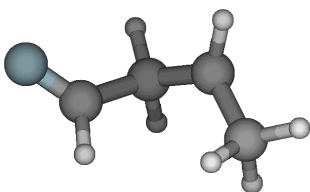 | C                                                                                                                                                                            | 1.1134948109  | -0.2691748351 | -0.0748088760 |
|                                                                                     | C                                                                                                                                                                            | 0.0656105708  | 0.6055951989  | 0.6270804275  |
|                                                                                     | C                                                                                                                                                                            | -1.2449172809 | 0.3828811014  | -0.0053904417 |
|                                                                                     | C                                                                                                                                                                            | -1.9514865246 | -0.9045209688 | 0.1839747062  |
|                                                                                     | H                                                                                                                                                                            | 0.0574047254  | 0.2998194802  | 1.6728920410  |
|                                                                                     | H                                                                                                                                                                            | 0.3923211063  | 1.6369065433  | 0.5607683136  |
|                                                                                     | H                                                                                                                                                                            | -1.5165011803 | 1.0101474551  | -0.8362719736 |
|                                                                                     | H                                                                                                                                                                            | 0.9392827837  | -1.344334226  | -0.0283056287 |
|                                                                                     | H                                                                                                                                                                            | -1.4894449975 | -1.7091069929 | -0.3989215336 |
|                                                                                     | H                                                                                                                                                                            | -1.9285647805 | -1.2163451992 | 1.2272019078  |
|                                                                                     | H                                                                                                                                                                            | -2.9887254223 | -0.8415107259 | -0.1319510690 |
|                                                                                     | N                                                                                                                                                                            | 2.0676461888  | 0.1796731690  | -0.6691478735 |
| E(UMP2)                                                                             | -210.89053210217                                                                                                                                                             |               |               |               |
| E(UCCSD(T))                                                                         | -210.89746555                                                                                                                                                                |               |               |               |
| Rotational constants (MHz)                                                          | Ae=13509.2483                                                                                                                                                                | Be=2866.2445  | Ce=2644.9309  |               |
| Harmonic frequencies (cm <sup>-1</sup> )                                            | ν(a')=3249, 3177, 3161, 3104, 3092, 3077, 3020, 2149, 1511, 1506, 1491, 1435, 1399, 1300, 1258, 1215, 1184, 1090, 1018, 961, 913, 894, 831, 519, 448, 399, 279, 148, 110, 81 |               |               |               |
| ZPE (cm <sup>-1</sup> )                                                             | 22015.50                                                                                                                                                                     |               |               |               |



| <b>ts_mep2</b>                                                                    |                                                                                                                                                                                          |               |               |               |
|-----------------------------------------------------------------------------------|------------------------------------------------------------------------------------------------------------------------------------------------------------------------------------------|---------------|---------------|---------------|
| 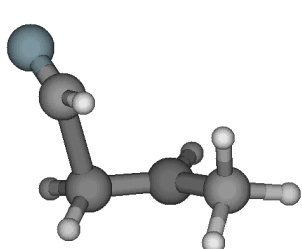 | C                                                                                                                                                                                        | -1.8953564417 | -0.9118654051 | 0.1800444074  |
|                                                                                   | C                                                                                                                                                                                        | -1.1896349950 | 0.3738987884  | -0.0196586145 |
|                                                                                   | C                                                                                                                                                                                        | 1.1882300952  | -0.4064265687 | -0.1760282133 |
|                                                                                   | N                                                                                                                                                                                        | 2.1047839718  | 0.1152290572  | -0.6933557341 |
|                                                                                   | C                                                                                                                                                                                        | 0.0245558629  | 0.640137172   | 0.6325150052  |
|                                                                                   | H                                                                                                                                                                                        | -1.4649021984 | 0.9840438279  | -0.8632736769 |
|                                                                                   | H                                                                                                                                                                                        | -1.4497460990 | -1.6980809078 | -0.4421913259 |
|                                                                                   | H                                                                                                                                                                                        | -1.8336150665 | -1.2447515053 | 1.2136691551  |
|                                                                                   | H                                                                                                                                                                                        | -2.9423255655 | -0.8465371496 | -0.1012619330 |
|                                                                                   | H                                                                                                                                                                                        | 0.8317470347  | -1.4175830272 | -0.0495132510 |
|                                                                                   | H                                                                                                                                                                                        | 0.4500492158  | 1.6233229440  | 0.5121818326  |
|                                                                                   | H                                                                                                                                                                                        | 0.1328731857  | 0.2508817743  | 1.6389123482  |
| E(UMP2)                                                                           | -210.88371470769                                                                                                                                                                         |               |               |               |
| E(UCCSD(T))                                                                       | -210.90149729                                                                                                                                                                            |               |               |               |
| Rotational constants (MHz)                                                        | Ae=12665.1794                                                                                                                                                                            | Be=2895.2286  | Ce=2625.6959  |               |
| Anharmonic frequencies (cm <sup>-1</sup> )                                        | ν(a')=-1004, 3255, 3237, 3198, 3167, 3145, 3114, 3009,<br>2185, 1538, 1512, 1501, 1444, 1409, 1255, 1214, 1150,<br>1097, 1034, 1000, 947, 924, 830, 656, 433, 410, 288, 157,<br>111, 110 |               |               |               |
| ZPE (cm <sup>-1</sup> )                                                           | 21672.68                                                                                                                                                                                 |               |               |               |
